# Supplementary material
Source: HighWire-hosted journal article supplement (https://ebm.bmj.com/content/22/6/197)
Supplement: inline-supplementary-material-1 [file inline-supplementary-material-1.pdf]

**References to EBM commentaries published between December 2016 and September 2017 thought to be practice changing:**

Peto J, Gilham C. Longer screening intervals are recommended following a negative HPV test in primary cervical screening

[\*Evidence-Based Medicine\*](#) 2017;**22**:178.

Cazzola M, Rogliani P. In stable COPD, long-acting muscarinic antagonist plus long-acting beta-agonists resulted in less exacerbations, pneumonia and larger improvement in FEV 1 than long-acting beta-agonists plus inhaled corticosteroids

[\*Evidence-Based Medicine\*](#) 2017;**22**:183-184.

Dudley D. Serial transvaginal cervical length measurements and quantitative vaginal fetal fibronectin concentrations did not predict spontaneous preterm birth in low-risk nulliparous women

[\*Evidence-Based Medicine\*](#) 2017;**22**:188.

Travers CP, Carlo WA. Antenatal corticosteroid administration between 24 hours and 7 days before extremely preterm delivery is associated with the lowest rate of mortality

[\*Evidence-Based Medicine\*](#) 2017;**22**:189.

de Gara C, Falk V. Over half of the patients who undergo adjustable gastric banding may require revision bariatric surgery

[\*Evidence-Based Medicine\*](#) 2017;**22**:191.

Sihvonen R. Meniscal resection may not benefit patients with traumatic meniscal tears

[\*Evidence-Based Medicine\*](#) 2017;**22**:193.

Rivera-Caravaca JM, Lip GYH. Apixaban may have lower risk of GI bleeding compared with dabigatran and rivaroxaban in patients with atrial fibrillation

[\*Evidence-Based Medicine\*](#) 2017;**22**:154-155.

Dumont-Mathieu T. Use of the M-CHAT follow-up interview (M-CHAT/F) by paediatricians during well-child care visits is feasible, valid and reliable

[\*Evidence-Based Medicine\*](#) 2017;**22**:156.

Dahm P, Ilic D, Wilt T. Similar prostate cancer and all-cause mortality in men with localised prostate cancer undergoing surgery or radiation therapy versus active monitoring at 10 years of follow-up

[\*Evidence-Based Medicine\*](#) 2017;**22**:93.

Sandset EC, Fischer U. Intensive blood pressure lowering provides no additional benefits and results in more adverse events

[\*Evidence-Based Medicine\*](#) 2017;**22**:102.

Onakpoya I. Oral antibiotics are as effective as intravenous antibiotics for postdischarge treatment of complicated pneumonia in children

[Evidence-Based Medicine](#) 2017;**22**:105.

Murphy BM. Stress management training should be an integral component of cardiac rehabilitation

[Evidence-Based Medicine](#) 2017;**22**:65.

Doggrell SA. Liraglutide, a GLP-1 receptor agonist, prevents cardiovascular outcomes in patients with type 2 diabetes

[Evidence-Based Medicine](#) 2017;**22**:28.

Rutherford GW, Anglemyer A. Early initiation of antiretroviral therapy prevents HIV transmission to seronegative sexual partners

[Evidence-Based Medicine](#) 2017;**22**:29.

Weber MA. Intensive treatment of hypertension to a SBP <120 mm Hg in patients aged 75 and over reduces mortality and cardiovascular events

[Evidence-Based Medicine](#) 2017;**22**:30.

Castanon A. Cone depth increases risk of adverse obstetric outcomes following treatment for cervical preinvasive disease

[Evidence-Based Medicine](#) 2017;**22**:37.

Adams J, Mills SDH. Consuming meals prepared at home more frequently appears to reduce the risk of type 2 diabetes, weight gain and obesity

[Evidence-Based Medicine](#) 2017;**22**:38

Tyson JE, Miller CC. Whether neonatal phototherapy increases the risk of cancer in children is a disturbing unresolved issue

[Evidence-Based Medicine](#) 2017;**22**:39-40.

Lee SK. Implementing evidence-based practices improves neonatal outcomes

[Evidence-Based Medicine](#) 2016;**21**:231.

Løkkegaard E. Low-dose second-generation oral contraceptives are associated with the lowest increased risk of cardiovascular adverse effects

[Evidence-Based Medicine](#) 2016;**21**:232.

Neovius M, Stephansson O. Careful monitoring of fetal growth and maternal nutritional status should be practiced in pregnant women with a history of bariatric surgery

[Evidence-Based Medicine](#) 2016;**21**:233.

Than M. Traditionally taught clinical variables and risk factors perform poorly in the prediction of acute coronary syndromes in the emergency department

[Evidence-Based Medicine](#) 2016;**21**:236.
